# Supplementary material for: Toward Sustainable and Healthy Fish Products—The Role of Feeding and Preservation Techniques
Source: MDPI journal article supplement (doi:10.3390/foods12162991), 2023-08-08
Supplement: s1 [file s1]

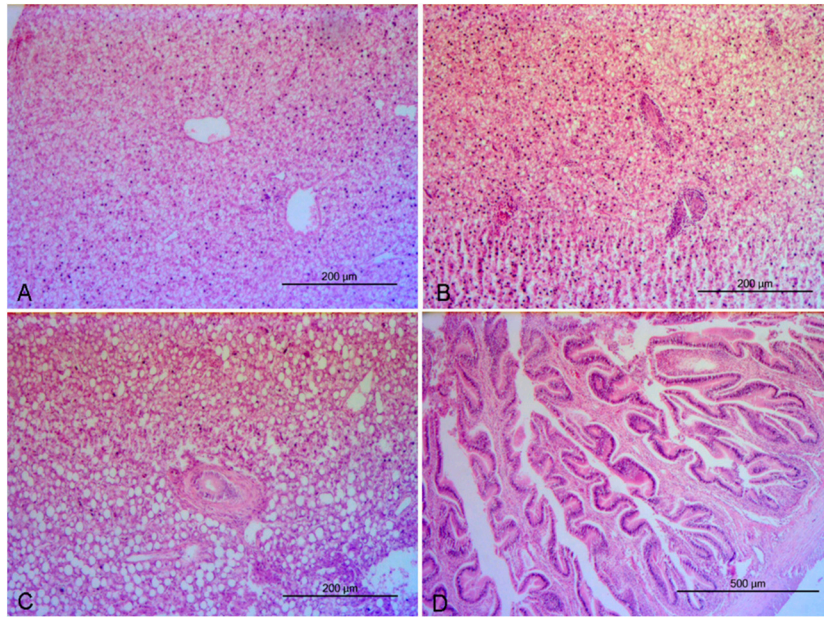

**Figure S1.** Sea bass liver and anterior gut histopathological examination. A) Mild lipid accumulation. B) Mild lipid accumulation and white blood cells infiltration C) Steatosis. D) Normal anterior gut.
