# Supplementary material for: Toward Sustainable and Healthy Fish Products—The Role of Feeding and Preservation Techniques
Source: MDPI journal article supplement (doi:10.3390/foods12162991), 2023-08-08
Supplement: s1 [file s1]

**Table S2.** Percent fatty acids composition of digested NT and treated fillets from seabass fed the different diets. Data are expressed as mol/100 mol FAMES and are means  $\pm$  SD of 3 biological replicates. Statistical analysis was the one-way ANOVA using Tukey's as post-hoc test. Different letters in the same row indicate statistical significance (at least  $p < 0.05$ ). NT = not treated

| Standard feed       |                               |                               |                               |                               |         |
|---------------------|-------------------------------|-------------------------------|-------------------------------|-------------------------------|---------|
|                     | NT                            | Brining                       | PEF                           | Brining + PEF                 | p value |
| 14:0                | 3.40 $\pm$ 0.03 <sup>a</sup>  | 3.41 $\pm$ 0.05 <sup>a</sup>  | 3.65 $\pm$ 0.30 <sup>a</sup>  | 3.65 $\pm$ 0.07 <sup>a</sup>  | 0.1388  |
| 16:0                | 21.12 $\pm$ 0.44 <sup>a</sup> | 21.45 $\pm$ 0.68 <sup>a</sup> | 20.78 $\pm$ 0.54 <sup>a</sup> | 20.46 $\pm$ 0.50 <sup>a</sup> | 0.2210  |
| 16:1 n-7            | 4.23 $\pm$ 0.27 <sup>a</sup>  | 4.25 $\pm$ 0.08 <sup>a</sup>  | 4.32 $\pm$ 0.39 <sup>a</sup>  | 4.31 $\pm$ 0.24 <sup>a</sup>  | 0.9683  |
| 18:0                | 4.25 $\pm$ 0.25 <sup>a</sup>  | 2.83 $\pm$ 0.32 <sup>bc</sup> | 3.76 $\pm$ 0.34 <sup>ab</sup> | 2.14 $\pm$ 0.55 <sup>c</sup>  | 0.0006  |
| 18:1 n-9            | 26.93 $\pm$ 0.47 <sup>a</sup> | 27.58 $\pm$ 1.95 <sup>a</sup> | 25.91 $\pm$ 0.29 <sup>a</sup> | 26.95 $\pm$ 1.35 <sup>a</sup> | 0.4545  |
| 18:2 n-6            | 9.47 $\pm$ 0.15 <sup>a</sup>  | 9.55 $\pm$ 0.21 <sup>a</sup>  | 9.76 $\pm$ 0.10 <sup>a</sup>  | 9.81 $\pm$ 0.40 <sup>a</sup>  | 0.3243  |
| 18:3 n-3            | 2.27 $\pm$ 0.10 <sup>a</sup>  | 2.43 $\pm$ 0.11 <sup>a</sup>  | 2.35 $\pm$ 0.03 <sup>a</sup>  | 2.51 $\pm$ 0.13 <sup>a</sup>  | 0.0832  |
| 20:1 n-9            | 6.16 $\pm$ 0.21 <sup>a</sup>  | 6.42 $\pm$ 0.40 <sup>ab</sup> | 6.70 $\pm$ 0.14 <sup>ab</sup> | 7.07 $\pm$ 0.23 <sup>b</sup>  | 0.0148  |
| 20:4 n-6            | 0.93 $\pm$ 0.02 <sup>a</sup>  | 0.94 $\pm$ 0.15 <sup>a</sup>  | 0.93 $\pm$ 0.07 <sup>a</sup>  | 0.83 $\pm$ 0.06 <sup>a</sup>  | 0.4300  |
| 20:5 n-3            | 6.13 $\pm$ 0.24 <sup>a</sup>  | 5.60 $\pm$ 0.22 <sup>b</sup>  | 6.36 $\pm$ 0.15 <sup>a</sup>  | 5.96 $\pm$ 0.36 <sup>ab</sup> | 0.0344  |
| 22:5 n-3            | 1.38 $\pm$ 0.03 <sup>a</sup>  | 1.42 $\pm$ 0.13 <sup>a</sup>  | 1.39 $\pm$ 0.07 <sup>a</sup>  | 1.46 $\pm$ 0.10 <sup>a</sup>  | 0.7089  |
| 22:6 n-3            | 13.75 $\pm$ 0.69 <sup>a</sup> | 14.13 $\pm$ 1.19 <sup>a</sup> | 14.09 $\pm$ 0.84 <sup>a</sup> | 14.85 $\pm$ 2.02 <sup>a</sup> | 0.7672  |
| New formulated feed |                               |                               |                               |                               |         |
|                     | NT                            | Brining                       | PEF                           | Brining + PEF                 | p value |
| 14:0                | 3.31 $\pm$ 0.22 <sup>a</sup>  | 3.24 $\pm$ 0.17 <sup>a</sup>  | 3.45 $\pm$ 0.05 <sup>a</sup>  | 3.53 $\pm$ 0.16 <sup>a</sup>  | 0.1973  |
| 16:0                | 21.24 $\pm$ 0.17 <sup>a</sup> | 20.18 $\pm$ 0.56 <sup>a</sup> | 20.94 $\pm$ 0.41 <sup>a</sup> | 20.48 $\pm$ 0.73 <sup>a</sup> | 0.1281  |
| 16:1 n-7            | 4.45 $\pm$ 0.34 <sup>a</sup>  | 4.53 $\pm$ 0.15 <sup>a</sup>  | 4.59 $\pm$ 0.02 <sup>a</sup>  | 4.77 $\pm$ 0.10 <sup>a</sup>  | 0.2881  |
| 18:0                | 4.51 $\pm$ 0.02 <sup>a</sup>  | 3.93 $\pm$ 0.20 <sup>a</sup>  | 4.01 $\pm$ 0.14 <sup>a</sup>  | 3.54 $\pm$ 0.83 <sup>a</sup>  | 0.1292  |
| 18:1 n-9            | 30.44 $\pm$ 0.29 <sup>a</sup> | 31.26 $\pm$ 1.26 <sup>a</sup> | 30.39 $\pm$ 0.36 <sup>a</sup> | 31.62 $\pm$ 0.35 <sup>a</sup> | 0.1516  |
| 18:2 n-6            | 9.83 $\pm$ 0.23 <sup>a</sup>  | 10.28 $\pm$ 0.10 <sup>a</sup> | 9.93 $\pm$ 0.29 <sup>a</sup>  | 10.24 $\pm$ 0.37 <sup>a</sup> | 0.1764  |
| 18:3 n-3            | 2.24 $\pm$ 0.04 <sup>a</sup>  | 2.49 $\pm$ 0.17 <sup>a</sup>  | 2.33 $\pm$ 0.05 <sup>a</sup>  | 2.42 $\pm$ 0.06 <sup>a</sup>  | 0.0559  |
| 20:1 n-9            | 5.13 $\pm$ 0.08 <sup>a</sup>  | 5.64 $\pm$ 0.19 <sup>b</sup>  | 5.32 $\pm$ 0.13 <sup>ab</sup> | 5.61 $\pm$ 0.07 <sup>b</sup>  | 0.0032  |
| 20:4 n-6            | 0.87 $\pm$ 0.07 <sup>a</sup>  | 0.89 $\pm$ 0.07 <sup>a</sup>  | 0.88 $\pm$ 0.06 <sup>a</sup>  | 0.85 $\pm$ 0.09 <sup>a</sup>  | 0.9184  |
| 20:5 n-3            | 5.28 $\pm$ 0.23 <sup>a</sup>  | 5.35 $\pm$ 0.31 <sup>a</sup>  | 5.44 $\pm$ 0.07 <sup>a</sup>  | 5.10 $\pm$ 0.41 <sup>a</sup>  | 0.5406  |
| 22:5 n-3            | 1.38 $\pm$ 0.07 <sup>a</sup>  | 1.34 $\pm$ 0.08 <sup>a</sup>  | 1.37 $\pm$ 0.04 <sup>a</sup>  | 1.37 $\pm$ 0.12 <sup>a</sup>  | 0.9384  |
| 22:6 n-3            | 11.32 $\pm$ 0.81 <sup>a</sup> | 10.87 $\pm$ 0.73 <sup>a</sup> | 11.36 $\pm$ 0.38 <sup>a</sup> | 10.47 $\pm$ 1.47 <sup>a</sup> | 0.6292  |
