# Supplementary material for: Toward Sustainable and Healthy Fish Products—The Role of Feeding and Preservation Techniques
Source: MDPI journal article supplement (doi:10.3390/foods12162991), 2023-08-08
Supplement: s1 [file s1]

**Table S1.** Percent fatty acids composition of not-digested NT and treated fillets from seabass fed the different diets. Data are expressed as mol/100 mol FAMES and are means  $\pm$  SD of 3 biological replicates. Statistical analysis was the one-way ANOVA using Tukey's as post-hoc test. Different letters in the same row indicate statistical significance (at least  $p < 0.05$ ). NT = not treated.

| <b>Standard feed</b>       |                               |                               |                               |                               |         |
|----------------------------|-------------------------------|-------------------------------|-------------------------------|-------------------------------|---------|
|                            | NT                            | Brining                       | PEF                           | Brining + PEF                 | p value |
| 14:0                       | 3.31 $\pm$ 0.07 <sup>a</sup>  | 2.64 $\pm$ 0.24 <sup>b</sup>  | 3.21 $\pm$ 0.36 <sup>ab</sup> | 3.46 $\pm$ 0.35 <sup>a</sup>  | 0.0322  |
| 16:0                       | 19.78 $\pm$ 0.44 <sup>a</sup> | 21.04 $\pm$ 0.86 <sup>a</sup> | 19.97 $\pm$ 0.48 <sup>a</sup> | 20.16 $\pm$ 0.38 <sup>a</sup> | 0.1052  |
| 16:1 n-7                   | 3.98 $\pm$ 0.28 <sup>a</sup>  | 3.71 $\pm$ 0.26 <sup>a</sup>  | 3.99 $\pm$ 0.21 <sup>a</sup>  | 4.75 $\pm$ 0.35 <sup>b</sup>  | 0.0096  |
| 18:0                       | 4.15 $\pm$ 0.26 <sup>a</sup>  | 5.15 $\pm$ 0.06 <sup>b</sup>  | 4.25 $\pm$ 0.28 <sup>a</sup>  | 4.23 $\pm$ 0.35 <sup>a</sup>  | 0.0047  |
| 18:1 n-9                   | 25.82 $\pm$ 0.78 <sup>a</sup> | 24.25 $\pm$ 0.91 <sup>a</sup> | 26.14 $\pm$ 1.51 <sup>a</sup> | 26.04 $\pm$ 1.18 <sup>a</sup> | 0.2180  |
| 18:2 n-6                   | 9.69 $\pm$ 0.05 <sup>a</sup>  | 8.42 $\pm$ 0.10 <sup>b</sup>  | 9.63 $\pm$ 0.26 <sup>a</sup>  | 9.74 $\pm$ 0.57 <sup>a</sup>  | 0.0025  |
| 18:3 n-3                   | 2.40 $\pm$ 0.10 <sup>a</sup>  | 2.07 $\pm$ 0.04 <sup>b</sup>  | 2.52 $\pm$ 0.13 <sup>a</sup>  | 2.48 $\pm$ 0.12 <sup>a</sup>  | 0.0027  |
| 20:1 n-9                   | 5.69 $\pm$ 0.13 <sup>a</sup>  | 4.89 $\pm$ 0.58 <sup>a</sup>  | 5.34 $\pm$ 0.81 <sup>a</sup>  | 5.97 $\pm$ 0.25 <sup>a</sup>  | 0.1401  |
| 20:4 n-6                   | 0.98 $\pm$ 0.01 <sup>a</sup>  | 1.19 $\pm$ 0.11 <sup>b</sup>  | 1.05 $\pm$ 0.02 <sup>ab</sup> | 0.97 $\pm$ 0.09 <sup>a</sup>  | 0.0194  |
| 20:5 n-3                   | 6.78 $\pm$ 0.47 <sup>a</sup>  | 6.78 $\pm$ 0.39 <sup>a</sup>  | 6.71 $\pm$ 0.14 <sup>a</sup>  | 6.29 $\pm$ 0.30 <sup>a</sup>  | 0.3170  |
| 22:5 n-3                   | 1.49 $\pm$ 0.04 <sup>a</sup>  | 1.42 $\pm$ 0.07 <sup>a</sup>  | 1.46 $\pm$ 0.02 <sup>a</sup>  | 1.40 $\pm$ 0.04 <sup>a</sup>  | 0.1547  |
| 22:6 n-3                   | 15.92 $\pm$ 0.73 <sup>a</sup> | 18.43 $\pm$ 2.11 <sup>a</sup> | 15.72 $\pm$ 0.37 <sup>a</sup> | 14.52 $\pm$ 1.72 <sup>a</sup> | 0.0517  |
| <b>New formulated feed</b> |                               |                               |                               |                               |         |
|                            | NT                            | Brining                       | PEF                           | Brining + PEF                 | p value |
| 14:0                       | 3.12 $\pm$ 0.12 <sup>a</sup>  | 2.84 $\pm$ 0.20 <sup>a</sup>  | 2.88 $\pm$ 0.34 <sup>a</sup>  | 2.89 $\pm$ 0.27 <sup>a</sup>  | 0.5303  |
| 16:0                       | 20.37 $\pm$ 0.21 <sup>a</sup> | 20.36 $\pm$ 0.85 <sup>a</sup> | 20.10 $\pm$ 0.64 <sup>a</sup> | 20.54 $\pm$ 0.32 <sup>a</sup> | 0.7287  |
| 16:1 n-7                   | 4.42 $\pm$ 0.10 <sup>a</sup>  | 4.11 $\pm$ 0.14 <sup>a</sup>  | 4.30 $\pm$ 0.26 <sup>a</sup>  | 4.22 $\pm$ 0.09 <sup>a</sup>  | 0.2005  |
| 18:0                       | 4.47 $\pm$ 0.15 <sup>a</sup>  | 5.00 $\pm$ 0.19 <sup>a</sup>  | 4.61 $\pm$ 0.55 <sup>a</sup>  | 4.90 $\pm$ 0.25 <sup>a</sup>  | 0.2385  |
| 18:1 n-9                   | 30.14 $\pm$ 0.37 <sup>a</sup> | 28.48 $\pm$ 0.47 <sup>a</sup> | 29.03 $\pm$ 1.03 <sup>a</sup> | 29.10 $\pm$ 0.46 <sup>a</sup> | 0.0681  |
| 18:2 n-6                   | 9.88 $\pm$ 0.24 <sup>a</sup>  | 9.63 $\pm$ 0.28 <sup>a</sup>  | 9.64 $\pm$ 0.41 <sup>a</sup>  | 9.57 $\pm$ 0.30 <sup>a</sup>  | 0.6500  |
| 18:3 n-3                   | 2.44 $\pm$ 0.06 <sup>a</sup>  | 2.43 $\pm$ 0.09 <sup>a</sup>  | 2.42 $\pm$ 0.11 <sup>a</sup>  | 2.48 $\pm$ 0.14 <sup>a</sup>  | 0.8994  |
| 20:1 n-9                   | 4.85 $\pm$ 0.19 <sup>a</sup>  | 4.69 $\pm$ 0.34 <sup>a</sup>  | 4.65 $\pm$ 0.22 <sup>a</sup>  | 4.86 $\pm$ 0.04 <sup>a</sup>  | 0.5803  |
| 20:4 n-6                   | 0.91 $\pm$ 0.03 <sup>a</sup>  | 1.04 $\pm$ 0.05 <sup>b</sup>  | 1.01 $\pm$ 0.06 <sup>ab</sup> | 1.01 $\pm$ 0.02 <sup>ab</sup> | 0.0273  |
| 20:5 n-3                   | 5.69 $\pm$ 0.03 <sup>a</sup>  | 6.22 $\pm$ 0.51 <sup>a</sup>  | 6.18 $\pm$ 0.48 <sup>a</sup>  | 5.85 $\pm$ 0.11 <sup>a</sup>  | 0.3320  |
| 22:5 n-3                   | 1.35 $\pm$ 0.04 <sup>a</sup>  | 1.30 $\pm$ 0.04 <sup>a</sup>  | 1.36 $\pm$ 0.09 <sup>a</sup>  | 1.31 $\pm$ 0.02 <sup>a</sup>  | 0.4872  |
| 22:6 n-3                   | 12.36 $\pm$ 0.50 <sup>a</sup> | 13.90 $\pm$ 1.10 <sup>a</sup> | 13.83 $\pm$ 1.34 <sup>a</sup> | 13.27 $\pm$ 0.02 <sup>a</sup> | 0.2182  |
